# Supplementary material for: Cobalt Oxide-Decorated Silicon Carbide Nano-Tree Array Electrode for Micro-Supercapacitor Application
Source: MDPI journal article supplement (doi:10.3390/ma14164514), 2021-08-11
Supplement: s1 [file s1]

## Article

# Cobalt Oxide-Decorated Silicon Carbide Nano-Tree Array Electrode for Micro-Supercapacitor Application

Chuan-Pei Lee <sup>1,2,\*</sup>, Bayu-Tri Murti <sup>1,3,4</sup>, Po-Kang Yang <sup>4</sup>, Francesca Rossi <sup>5</sup>, Carlo Carraro <sup>2</sup> and Roya Maboudian <sup>2,\*</sup>

<sup>1</sup> Department of Applied Physics and Chemistry, University of Taipei, Taipei 10048, Taiwan; CPLee@utapei.edu.tw

<sup>2</sup> Department of Chemical and Biomolecular Engineering, Berkeley Sensor & Actuator Center, University of California, Berkeley, CA 94720, USA; carraro@yahoo.com

<sup>3</sup> Graduate Institute of Biomedical Materials and Tissue Engineering, College of Biomedical Engineering, Taipei Medical University, Taipei 11031, Taiwan

<sup>4</sup> Department of Biomedical Sciences and Engineering, National Central University, Chung-li 32001, Taiwan; pkyang@ncu.edu.tw

<sup>5</sup> IMEM-CNR Institute, Parco Area delle Scienze 37/A, 43124 Parma, Italy; frossi@imem.cnr.it

\* Correspondence: CPLee@utapei.edu.tw (C.-P.L.); maboudia@berkeley.edu (R.M.)

**Abstract:** A cobalt oxide ( $\text{Co}_3\text{O}_4$ )-decorated silicon carbide (SiC) nano-tree array (denoted as  $\text{Co}_3\text{O}_4/\text{SiC}$  NTA) electrode is synthesized, and it is investigated for the use in the micro-supercapacitor. Firstly, the well-standing SiC nanowires (NWs) are prepared by nickel (Ni)-catalyzed chemical vapor deposition (CVD) method, and then the thin layer of  $\text{Co}_3\text{O}_4$  and the hierarchical  $\text{Co}_3\text{O}_4$  nano-flower-clusters are, respectively fabricated on the side-walls and the top side of the SiC NWs via electrodeposition. The deposition of  $\text{Co}_3\text{O}_4$  on the SiC NWs benefits for the charge transfer at the electrode/aqueous electrolyte interface due to its extremely hydrophilic surface characteristic after  $\text{Co}_3\text{O}_4$  decoration. Furthermore, the  $\text{Co}_3\text{O}_4/\text{SiC}$  NTA electrode would possess a directional charge transport route along the nanowire length of SiC NWs owing to their well-standing architecture. By using the  $\text{Co}_3\text{O}_4/\text{SiC}$  NTA electrode for micro-supercapacitor, the areal capacitance obtained from cyclic voltammetry measurement reaches  $845 \text{ mF cm}^{-2}$  at a  $10 \text{ mV s}^{-1}$  scan rate. Finally, the capacitance durability is also evaluated by the cycling test of cyclic voltammetry at a high scan rate of  $150 \text{ mV s}^{-1}$  for 2000 cycles.

**Keywords:** chemical vapor deposition; cobalt oxide; micro-supercapacitor; nanowire; silicon carbide

**Citation:** Lee, C.-P.; Murti, B.-T.; Yang, P.-K.; Rossi, F.; Carraro, C.; Maboudian, R. Cobalt Oxide-Decorated Silicon Carbide Nano-Tree Array Electrode for Micro-Supercapacitor Application. *Materials* **2021**, *14*, 4514. <https://doi.org/10.3390/ma14164514>

Academic Editor: Christian M. Julien

Received: 28 June 2021

Accepted: 02 August 2021

Published: 11 August 2021

**Publisher's Note:** MDPI stays neutral with regard to jurisdictional claims in published maps and institutional affiliations.

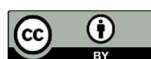

**Copyright:** © 2021 by the authors. Submitted for possible open access publication under the terms and conditions of the Creative Commons Attribution (CC BY) license (<http://creativecommons.org/licenses/by/4.0/>).

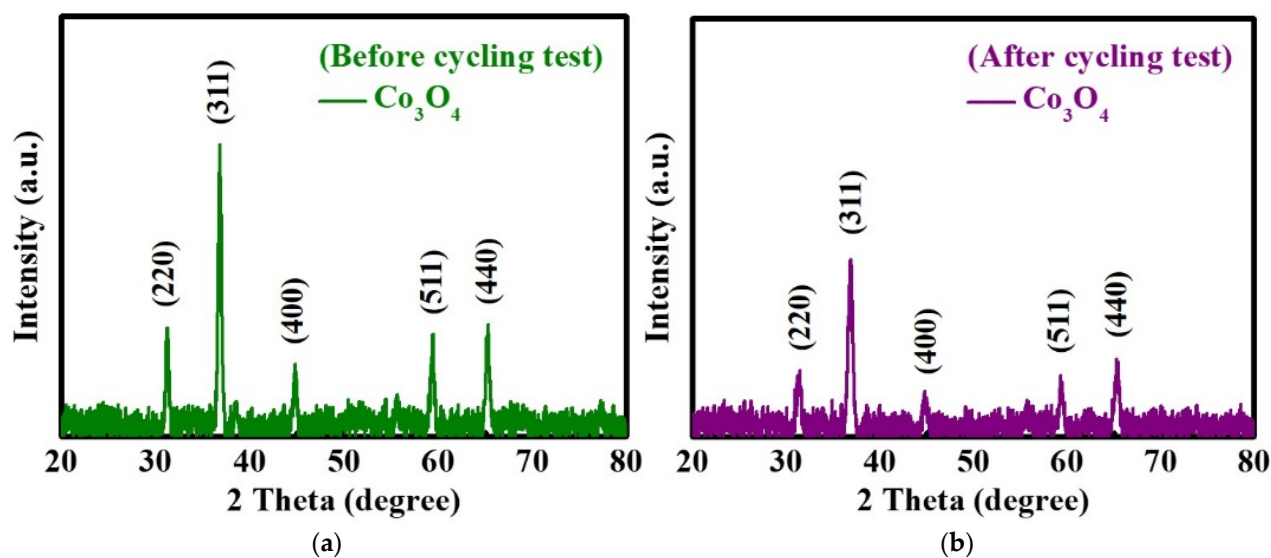

**Figure S1.** The XRD (X-ray diffraction) patterns of the  $\text{Co}_3\text{O}_4$  powder collected from the  $\text{Co}_3\text{O}_4/\text{SiC}$  NTA electrodes via ultrasonic. (a) Before and (b) after the cycling test of cyclic voltammetry.

Figure S1 shows the XRD (X-ray diffraction) patterns of the  $\text{Co}_3\text{O}_4$  powder collected from the  $\text{Co}_3\text{O}_4/\text{SiC}$  NTA electrodes before and after the cycling test of cyclic voltammetry. As revealed in Figure S1, all the diffraction peaks are attributed to spinel  $\text{Co}_3\text{O}_4$  phase (JCPDS 42-1467), indicating that the crystalline  $\text{Co}_3\text{O}_4$  has been formed as the  $\text{Co}_3\text{O}_4$ -deposited electrode was sintered under 350 °C for 1 h in air atmosphere; moreover, the crystalline structure of  $\text{Co}_3\text{O}_4$  is still remaining after the cycling test of cyclic voltammetry.
